# Supplementary material for: What is an archaeon and are the Archaea really unique?
Source: PubMed Central journal article supplement (PMC6196074; doi:10.7717/peerj.5770), 2018-10-18
Supplement: peerj-06-5770-s001.pdf [file peerj-06-5770-s001.pdf]

**Supplementary Material for**

**What is an Archaeon and are the Archaea Really Unique?**

Ajith Harish

Department of Cell and Molecular Biology, Section of Structural and Molecular Biology,  
Uppsala University, Uppsala, Sweden

|                               |               |
|-------------------------------|---------------|
| <b>Table of Contents.....</b> | <b>page #</b> |
| Supplementary Methods.....    | 02            |
| Supplementary References..... | 05            |
| Supplementary Figures.....    | 06            |
| Supplementary Tables.....     | 08            |

## SUPPLEMENTARY METHODS

### *Robustness of Root Placement and Tree Topology to Lineage-specific Rate Heterogeneity*

To assess the robustness of root placement to rate heterogeneity, both character-specific rate heterogeneity (CSRH) and lineage-specific rate heterogeneity (LSRH) was analyzed. Accounting for CSRH is described in the main text. The impact of LSRH on the placement of the root as well as the tree topology was assessed using relaxed-clock models. Relaxed-clock models account for LSRH as well as CSRH. Three different LSRH optimizations implemented in MrBayes 3.2, specifically, the CPP, TK02 and IGR models were analyzed under nonstationarity. The CPP model assumes that LSRH varies according to a compound Poisson process (Huelsenbeck, J.P., Larget, B., et al. 2000). Thorne–Kishino 2002 (TK02) model assumes a Brownian motion process in which LSRH is modeled according to an autocorrelated lognormal distribution (Thorne, J. and Kishino, H. 2002). The independent gamma rates (IGR) model (Lepage, T., Lawi, S., et al. 2006) assumes that each branch has an independent rate drawn from a gamma distribution. The difference between the models is different extent of rate variation allowed across the tree. For example the TK02 model assumes that LSRH between neighboring internodes of the tree are more similar than distant branches, where as the CPP models allows the rates to be change anywhere along the tree.

### *Robustness to Other Potential Errors*

The robustness of the phylogenies inferred from the directional evolution-model against several potential systematic biases was assessed, and reported in independent studies (see below). Multiple datasets with varying taxon sampling as well as character sampling strategies were employed. In what follows, the term superkingdom will be used in place of

“domain of life” to represent the highest-ranking taxa (Archaea, Bacteria and Eukarya) in the global tree of life (ToL). This is to avoid potential confusion with the “domain of protein-structure”.

(1) *Robustness to species sampling.* –Scalability of phylogenetic analysis as well as impact of species sampling on the directional model was compared by scale-up and scale down analyses. As for the former, phylogeny was estimated from four different datasets ranging from 75 species up to 336 species sampled across the tree of life (ToL). For the latter, i.e. scale-down analyses, phylogenies were estimated with as few as 30 species, sampled either across smaller clades (ranging from genera to phyla to kingdoms) or across the ToL (Harish, A., Tunlid, A., et al. 2013, Harish, A. and Kurland, C.G. 2017b).

In addition, here, further tests were conducted by excluding major taxa (e.g. all Eukarya) from the analyses to test if monophyly of the other taxa can still be recovered. Accordingly, trees were estimated for three combinations: (a) Archaea + Bacteria (Fig S2, A), (b) Archaea + Eukarya (Fig. S2, B) and (c) Bacteria + Eukarya (Fig. S2, C). Phylogenies were estimated in MrBayes using the relaxed-clock IGR model, since it is the best-fitting model (Fig. 6c), as described earlier. Here too Archaea, Bacteria and Eukarya were all monophyletic. The tree topologies for each of Archaea, Bacteria and Eukarya clades were almost identical compared to the full tree (Fig. 6a), except in one case. In the (Archaea + Eukarya) tree, the eukaryote clade was largely congruent.

(2) *Robustness to character sampling.* –This was assessed by the inclusion or exclusion of Superkingdom-specific characters (i.e. protein-domains), based on the broad phyletic distribution patterns. The total number of unique protein-domains varies extensively between Archaea, Bacteria and Eukarya, such that the least number of domains are shared amongst the species of archaea, followed by bacteria and the most number of domains shared between species of eukaryotes. Therefore, Superkingdom-specific protein-domains were

excluded from the analysis to assess potential bias in the root placement due to the biased distributions (Harish, A., Tunlid, A., et al. 2013, Harish, A. and Kurland, C.G. 2017a).

(3) *Robustness to small (or large) genome-size bias.* —The genomic composition of protein-domains is a reasonable proxy for the effective genome size measured as the number of proteins in a genome (or species) (Harish, A. and Kurland, C.G. 2017b). Accordingly the number of distinct domains in the each species sampled from archaea and bacteria is smaller, on average, compared to that of eukaryotes species. Therefore, robustness against potential artifacts arising solely due to genome size bias, e.g. ‘small genome attraction’ or ‘large genome attraction’ artifacts was assessed (Harish, A., Tunlid, A., et al. 2013, Harish, A. and Kurland, C.G. 2017a).

(4) *Uncertainty in presence—absence coding (ascertainment bias).* —Artifacts in SCOP-domain identification using hidden Markov models (HMMs) can affect the number of characters (domains) that can be scored for each species. For example false positives can inflate the number of ‘presence’ states while false negatives can inflate the number ‘absence’ states. Such character ‘coding bias’ can arise either due to suboptimal HMMs or due to a higher than expected sequence divergence in certain species or both. False positive identifications due to suboptimal HMMs are insignificant (~2% of all HMMs in SUPERFAMILY HMM library) (Gough, J., Karplus, K., et al. 2001, Pethica, R.B., Levitt, M., et al. 2012). However, estimating false negatives is nontrivial. Therefore false negatives were simulated by re-coding ‘presence’ states (1s) as ‘absence’ states (0s). Root placement as well as tree topology was robust to re-coding a large fraction (between 30% and 60%) (Harish, A. and Kurland, C.G. 2017c).

(5) *Quality of genome sequence data/annotations.* —The quality and consistency of genome annotation in terms of individual protein sequences and completeness of protein cohorts in a genome can often vary (Zaucha, J., Stahlhacke, J., et al. 2015) and can relate to

all of the biases explained above. Extensive analysis of multiple random samplings showed that the variation affects estimates of the domain abundance (copy number variation) but not of domain occurrence (presence-absence) analyses (Harish, A., Tunlid, A., et al. 2013, Harish, A. and Kurland, C.G. 2017b).

Altogether, the robustness of both root placement as well as the tree topology of the global ToL inferred from the SCOP-domain datasets against several potential phylogenetic artifacts were assessed. These comprehensive tests account for both stochastic errors as well as systematic biases.

#### SUPPLEMENTARY REFERENCES

Gough J, Karplus K, Hughey R, Chothia C. 2001. Assignment of homology to genome sequences using a library of hidden Markov models that represent all proteins of known structure. *Journal of Molecular Biology*, 313:903-919.

Harish A, Kurland CG. 2017a. Akaryotes and Eukaryotes are independent descendants of a universal common ancestor. *Biochimie*, 138:168-183.

Harish A, Kurland CG. 2017b. Empirical genome evolution models root the tree of life. *Biochimie*, 138:137-155.

Harish A, Kurland CG. 2017c. Mitochondria are not captive bacteria. *Journal of Theoretical Biology*, 434:88-98.

Harish A, Tunlid A, Kurland CG. 2013. Rooted phylogeny of the three superkingdoms. *Biochimie*, 95:1593-1604.

Huelsenbeck JP, Larget B, Swofford D. 2000. A compound Poisson process for relaxing the molecular clock. *Genetics*, 154:1879-1892.

Lepage T, Lawi S, Tupper P, Bryant D. 2006. Continuous and tractable models for the variation of evolutionary rates. *Mathematical biosciences*, 199:216-233.

Pethica RB, Levitt M, Gough J. 2012. Evolutionarily consistent families in SCOP: Sequence, structure and function. *BMC Structural Biology*, 12.

Thorne J, Kishino H. 2002. Divergence time estimation and rate evolution with multilocus data sets. *Syst. Biol*, 51:689-702.

Zauch a J, Stahlhacke J, Oates ME, Thurlby N, Rackham OJ, Fang H, Smithers B, Gough J. 2015. A proteome quality index. *Environmental microbiology*, 17:4-9.

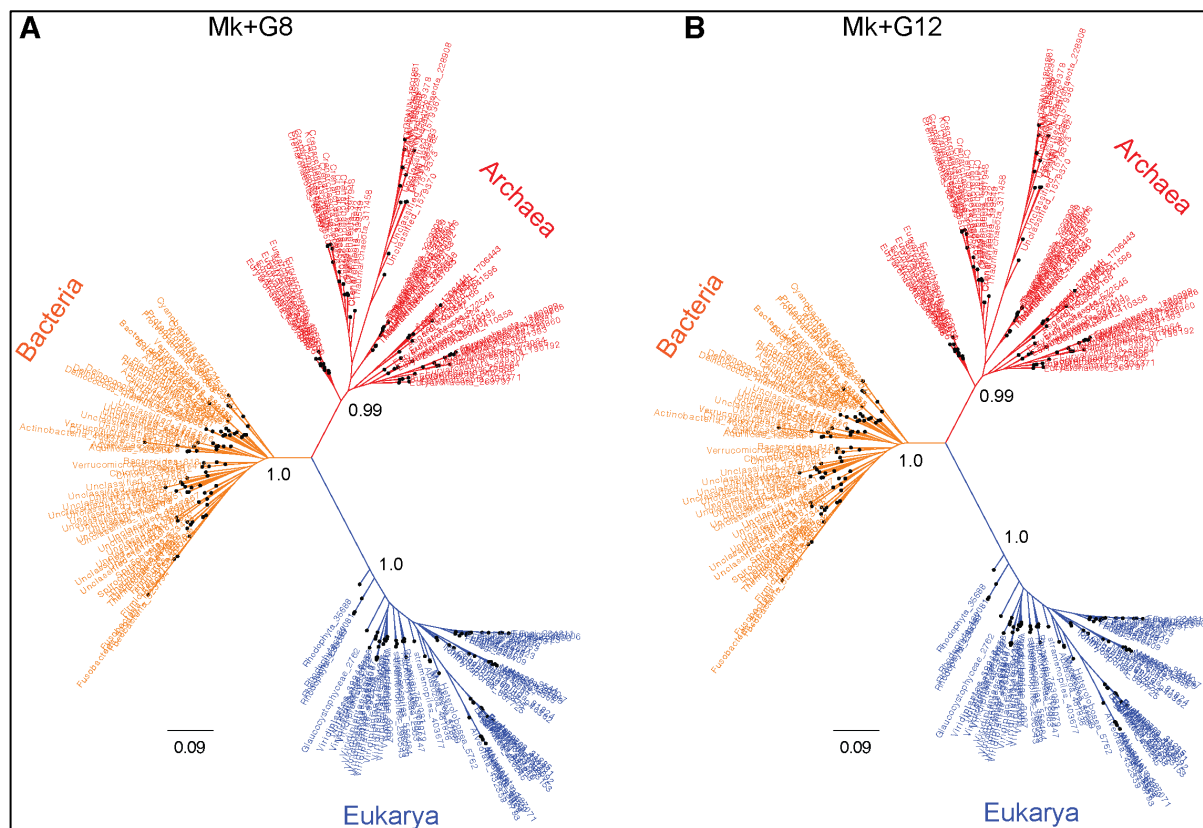

**SI Fig. 1** Unrooted genome trees derived from rate-heterogeneous versions of the Mk model. (A) Unrooted tree estimated from Mk+G8 model and (B) from Mk+G12 model. Scale bars represent expected number of changes per character. Branch support (posterior probability) is shown only for the major branches.

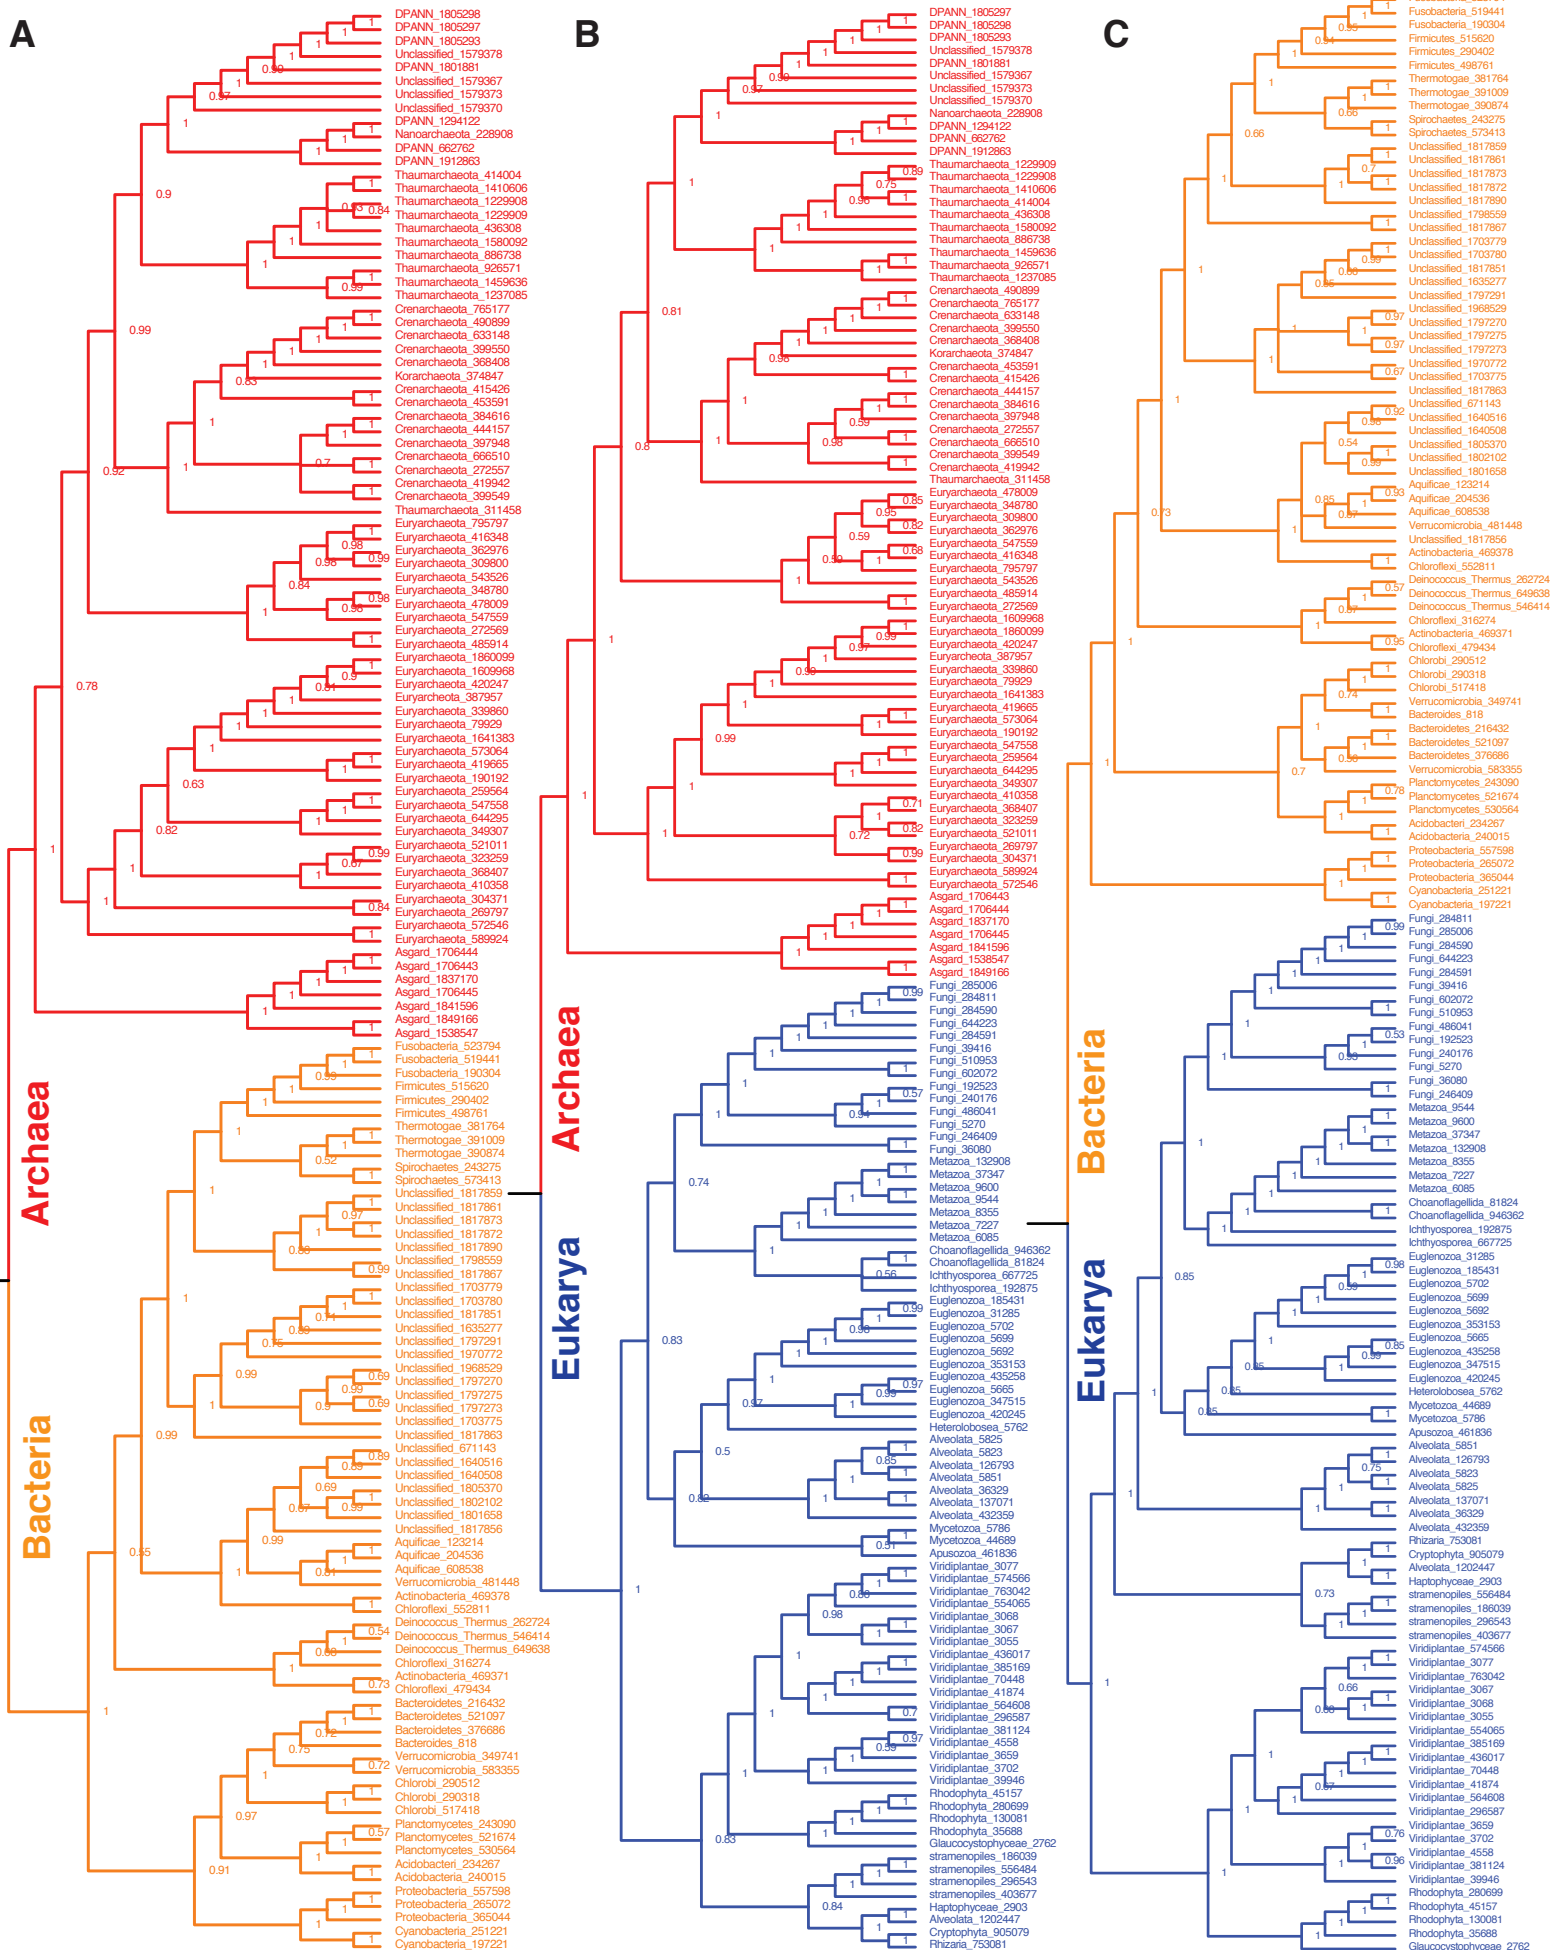

**Figure S2** Impact of excluding major taxa on rooting or monophyly. Phylogenies were estimated after deleting all the eukaryotes, bacteria and archaea. Accordingly, trees were estimated for three combinations: (A) Archaea + Bacteria (B) Archaea + Eukarya and (C) Bacteria + Eukarya. Phylogenies were estimated in MrBayes using the relaxed-clock IGR model.



**Table S1.** List of species sampled in the SCOP-II dataset

| Tree label             | Taxonomy ID | Scientific name                                       | Taxonomic group | Superkingdom |
|------------------------|-------------|-------------------------------------------------------|-----------------|--------------|
| Asgard_1538547         | 1538547     | <i>Lokiarchaeum</i> sp. GC14_75                       | Asgard          | Archaea      |
| Asgard_1706443         | 1706443     | <i>Candidatus Thorarchaeota archaeon SMTZ-45</i>      | Asgard          | Archaea      |
| Asgard_1706444         | 1706444     | <i>Candidatus Thorarchaeota archaeon SMTZ1-45</i>     | Asgard          | Archaea      |
| Asgard_1706445         | 1706445     | <i>Candidatus Thorarchaeota archaeon SMTZ1-83</i>     | Asgard          | Archaea      |
| Asgard_1837170         | 1837170     | <i>Candidatus Thorarchaeota archaeon AB_25</i>        | Asgard          | Archaea      |
| Asgard_1841596         | 1841596     | <i>Candidatus Heimdallarchaeota archaeon AB_125</i>   | Asgard          | Archaea      |
| Asgard_1849166         | 1849166     | <i>Candidatus Lokiarchaeota archaeon CR_4</i>         | Asgard          | Archaea      |
| Crenarchaeota_272557   | 272557      | <i>Aeropyrum pernix</i>                               | Crenarchaeota   | Archaea      |
| Crenarchaeota_368408   | 368408      | <i>Thermofilum pendens</i>                            | Crenarchaeota   | Archaea      |
| Crenarchaeota_384616   | 384616      | <i>Pyrobaculum islandicum</i>                         | Crenarchaeota   | Archaea      |
| Crenarchaeota_397948   | 397948      | <i>Caldivirga maquilingensis</i>                      | Crenarchaeota   | Archaea      |
| Crenarchaeota_399549   | 399549      | <i>Metallosphaera sedula</i>                          | Crenarchaeota   | Archaea      |
| Crenarchaeota_399550   | 399550      | <i>Staphylothermus marinus</i>                        | Crenarchaeota   | Archaea      |
| Crenarchaeota_415426   | 415426      | <i>Hyperthermus butylicus</i>                         | Crenarchaeota   | Archaea      |
| Crenarchaeota_419942   | 419942      | <i>Sulfolobus islandicus</i>                          | Crenarchaeota   | Archaea      |
| Crenarchaeota_444157   | 444157      | <i>Pyrobaculum neutrophilum</i>                       | Crenarchaeota   | Archaea      |
| Crenarchaeota_453591   | 453591      | <i>Ignicoccus hospitalis</i>                          | Crenarchaeota   | Archaea      |
| Crenarchaeota_490899   | 490899      | <i>Desulfurococcus amylolyticus</i>                   | Crenarchaeota   | Archaea      |
| Crenarchaeota_633148   | 633148      | <i>Thermosphaera aggregans</i>                        | Crenarchaeota   | Archaea      |
| Crenarchaeota_666510   | 666510      | <i>Acidilobus saccharovorans</i>                      | Crenarchaeota   | Archaea      |
| Crenarchaeota_765177   | 765177      | <i>Desulfurococcus mucosus</i>                        | Crenarchaeota   | Archaea      |
| DPANN_662762           | 662762      | <i>Candidatus Parvarchaeum acidophilum</i> ARMAN-5    | DPANN           | Archaea      |
| DPANN_1294122          | 1294122     | <i>Candidatus Nanobsidianus stetteri</i>              | DPANN           | Archaea      |
| DPANN_1801881          | 1801881     | <i>Candidatus Pacearchaeota archaeon RBG_13_36_9</i>  | DPANN           | Archaea      |
| DPANN_1805293          | 1805293     | <i>Candidatus Pacearchaeota archaeon CG1_02_30_18</i> | DPANN           | Archaea      |
| DPANN_1805297          | 1805297     | <i>Candidatus Pacearchaeota archaeon CG1_02_35_32</i> | DPANN           | Archaea      |
| DPANN_1805298          | 1805298     | <i>Candidatus Pacearchaeota archaeon CG1_02_39_14</i> | DPANN           | Archaea      |
| DPANN_1912863          | 1912863     | <i>Candidatus Micrarchaeum acidiphilum</i> ARMAN-1    | DPANN           | Archaea      |
| Euryarchaeota_79929    | 79929       | <i>Methanothermobacter marburgensis</i>               | Euryarchaeota   | Archaea      |
| Euryarchaeota_190192   | 190192      | <i>Methanopyrus kandleri</i>                          | Euryarchaeota   | Archaea      |
| Euryarchaeota_259564   | 259564      | <i>Methanococcoides burtonii</i>                      | Euryarchaeota   | Archaea      |
| Euryarchaeota_269797   | 269797      | <i>Methanosarcina barkeri</i>                         | Euryarchaeota   | Archaea      |
| Euryarchaeota_272569   | 272569      | <i>Haloarcula marismortui</i>                         | Euryarchaeota   | Archaea      |
| Euryarchaeota_304371   | 304371      | <i>Methanocella paludicola</i>                        | Euryarchaeota   | Archaea      |
| Euryarchaeota_309800   | 309800      | <i>Haloferax volcanii</i>                             | Euryarchaeota   | Archaea      |
| Euryarchaeota_323259   | 323259      | <i>Methanospirillum hungatei</i> JF-1                 | Euryarchaeota   | Archaea      |
| Euryarchaeota_339860   | 339860      | <i>Methanosphaera stadtmanae</i>                      | Euryarchaeota   | Archaea      |
| Euryarchaeota_348780   | 348780      | <i>Natronomonas pharaonis</i>                         | Euryarchaeota   | Archaea      |
| Euryarchaeota_349307   | 349307      | <i>Methanosaepta thermophila</i>                      | Euryarchaeota   | Archaea      |
| Euryarchaeota_362976   | 362976      | <i>Haloquadratum walsbyi</i>                          | Euryarchaeota   | Archaea      |
| Euryarchaeota_368407   | 368407      | <i>Methanoculleus marisnigri</i>                      | Euryarchaeota   | Archaea      |
| Euryarchaeota_410358   | 410358      | <i>Methanocorpusculum labreanum</i>                   | Euryarchaeota   | Archaea      |
| Euryarchaeota_416348   | 416348      | <i>Halorubrum lacusprofundi</i>                       | Euryarchaeota   | Archaea      |
| Euryarchaeota_419665   | 419665      | <i>Methanococcus aeolicus</i>                         | Euryarchaeota   | Archaea      |
| Euryarchaeota_420247   | 420247      | <i>Methanobrevibacter smithii</i>                     | Euryarchaeota   | Archaea      |
| Euryarchaeota_478009   | 478009      | <i>Halobacterium salinarum</i>                        | Euryarchaeota   | Archaea      |
| Euryarchaeota_485914   | 485914      | <i>Halomicrobium mukohataei</i>                       | Euryarchaeota   | Archaea      |
| Euryarchaeota_521011   | 521011      | <i>Methanosphaerula palustris</i>                     | Euryarchaeota   | Archaea      |
| Euryarchaeota_543526   | 543526      | <i>Haloterrigena turkmenica</i>                       | Euryarchaeota   | Archaea      |
| Euryarchaeota_547558   | 547558      | <i>Methanohalophilus mahii</i>                        | Euryarchaeota   | Archaea      |
| Euryarchaeota_547559   | 547559      | <i>Natrialba magadii</i>                              | Euryarchaeota   | Archaea      |
| Euryarchaeota_572546   | 572546      | <i>Archaeoglobus profundus</i>                        | Euryarchaeota   | Archaea      |
| Euryarchaeota_573064   | 573064      | <i>Methanocaldococcus fervens</i>                     | Euryarchaeota   | Archaea      |
| Euryarchaeota_589924   | 589924      | <i>Ferroglobus placidus</i>                           | Euryarchaeota   | Archaea      |
| Euryarchaeota_644295   | 644295      | <i>Methanohalobium evestigatum</i>                    | Euryarchaeota   | Archaea      |
| Euryarchaeota_795797   | 795797      | <i>Halalkalicoccus jeotgali</i>                       | Euryarchaeota   | Archaea      |
| Euryarchaeota_1609968  | 1609968     | <i>Methanobrevibacter</i> sp. YE315                   | Euryarchaeota   | Archaea      |
| Euryarchaeota_1641383  | 1641383     | <i>Methanobacterium</i> sp. 42_16                     | Euryarchaeota   | Archaea      |
| Euryarchaeota_1860099  | 1860099     | <i>Methanobrevibacter</i> sp. A27                     | Euryarchaeota   | Archaea      |
| Euryarchaeota_387957   | 387957      | <i>Methanobrevibacter</i> sp. 87.7                    | Euryarchaeota   | Archaea      |
| Korarchaeota_374847    | 374847      | <i>Korarchaeum cryptofilum</i>                        | Korarchaeota    | Archaea      |
| Nanoarchaeota_228908   | 228908      | <i>Nanoarchaeum equitans</i>                          | Nanoarchaeota   | Archaea      |
| Thaumarchaeota_311458  | 311458      | <i>Candidatus Caldiarchaeum subterraneum</i>          | Thaumarchaeota  | Archaea      |
| Thaumarchaeota_414004  | 414004      | <i>Cenarchaeum symbiosum</i>                          | Thaumarchaeota  | Archaea      |
| Thaumarchaeota_436308  | 436308      | <i>Nitrosopumilus maritimus</i>                       | Thaumarchaeota  | Archaea      |
| Thaumarchaeota_886738  | 886738      | <i>Candidatus Nitrosoarchaeum limnia</i> SFB1         | Thaumarchaeota  | Archaea      |
| Thaumarchaeota_926571  | 926571      | <i>Nitrososphaera viennensis</i> EN76                 | Thaumarchaeota  | Archaea      |
| Thaumarchaeota_1229908 | 1229908     | <i>Candidatus Nitrosopumilus koreensis</i> AR1        | Thaumarchaeota  | Archaea      |
| Thaumarchaeota_1229909 | 1229909     | <i>Candidatus Nitrosopumilus sediminis</i>            | Thaumarchaeota  | Archaea      |
| Thaumarchaeota_1237085 | 1237085     | <i>Nitrososphaera gargensis</i>                       | Thaumarchaeota  | Archaea      |
| Thaumarchaeota_1410606 | 1410606     | <i>Candidatus Nitrosopelagicus brevis</i>             | Thaumarchaeota  | Archaea      |
| Thaumarchaeota_1459636 | 1459636     | <i>Candidatus Nitrososphaera evergladensis</i> SR1    | Thaumarchaeota  | Archaea      |
| Thaumarchaeota_1580092 | 1580092     | <i>Candidatus Nitrosopumilus adriaticus</i>           | Thaumarchaeota  | Archaea      |
| Unclassified_1579367   | 1579367     | <i>archaeon</i> GW2011_AR5                            | Unclassified    | Archaea      |

|                            |         |                                                                     |                     |          |
|----------------------------|---------|---------------------------------------------------------------------|---------------------|----------|
| Unclassified_1579370       | 1579370 | archaeon GW2011_AR10                                                | Unclassified        | Archaea  |
| Unclassified_1579373       | 1579373 | archaeon GW2011_AR15                                                | Unclassified        | Archaea  |
| Unclassified_1579378       | 1579378 | archaeon GW2011_AR20                                                | Unclassified        | Archaea  |
|                            |         |                                                                     |                     |          |
| Acidobacteri_234267        | 234267  | <i>Solibacter usitatus</i>                                          | Acidobacteri        | Bacteria |
| Acidobacteria_240015       | 240015  | <i>Acidobacterium capsulatum</i>                                    | Acidobacteria       | Bacteria |
| Actinobacteria_469371      | 469371  | <i>Thermobispora bispora</i>                                        | Actinobacteria      | Bacteria |
| Actinobacteria_469378      | 469378  | <i>Cryptobacterium curtum</i>                                       | Actinobacteria      | Bacteria |
| Aquificae_123214           | 123214  | <i>Persephonella marina</i>                                         | Aquificae           | Bacteria |
| Aquificae_204536           | 204536  | <i>Sulfurihydrogenibium azorense</i>                                | Aquificae           | Bacteria |
| Aquificae_608538           | 608538  | <i>Hydrogenobacter thermophilus</i>                                 | Aquificae           | Bacteria |
| Bacteroides_818            | 818     | <i>Bacteroides thetaiotaomicron</i>                                 | Bacteroides         | Bacteria |
| Bacteroidetes_216432       | 216432  | <i>Croceibacter atlanticus</i>                                      | Bacteroidetes       | Bacteria |
| Bacteroidetes_376686       | 376686  | <i>Flavobacterium johnsoniae</i>                                    | Bacteroidetes       | Bacteria |
| Bacteroidetes_521097       | 521097  | <i>Capnocytophaga ochracea</i>                                      | Bacteroidetes       | Bacteria |
| Chlorobi_290318            | 290318  | <i>Chlorobium phaeovibrioides</i>                                   | Chlorobi            | Bacteria |
| Chlorobi_290512            | 290512  | <i>Prosthecochloris aestuarii</i>                                   | Chlorobi            | Bacteria |
| Chlorobi_517418            | 517418  | <i>Chloroherpeton thalassium</i>                                    | Chlorobi            | Bacteria |
| Chloroflexi_316274         | 316274  | <i>Herpetosiphon aurantiacus</i>                                    | Chloroflexi         | Bacteria |
| Chloroflexi_479434         | 479434  | <i>Sphaerobacter thermophilus</i>                                   | Chloroflexi         | Bacteria |
| Chloroflexi_552811         | 552811  | <i>Dehalogenimonas lykanthroporepellens</i>                         | Chloroflexi         | Bacteria |
| Cyanobacteria_197221       | 197221  | <i>Thermosynechococcus elongatus</i>                                | Cyanobacteria       | Bacteria |
| Cyanobacteria_251221       | 251221  | <i>Gloeobacter violaceus</i>                                        | Cyanobacteria       | Bacteria |
| Deinococcus_Thermus_262724 | 262724  | <i>Thermus thermophilus</i>                                         | Deinococcus_Thermus | Bacteria |
| Deinococcus_Thermus_546414 | 546414  | <i>Deinococcus deserti</i>                                          | Deinococcus_Thermus | Bacteria |
| Deinococcus_Thermus_649638 | 649638  | <i>Truepera radiovictrix</i>                                        | Deinococcus_Thermus | Bacteria |
| Firmicutes_290402          | 290402  | <i>Clostridium beijerinckii</i>                                     | Firmicutes          | Bacteria |
| Firmicutes_498761          | 498761  | <i>Helio bacterium modesticaldum</i>                                | Firmicutes          | Bacteria |
| Firmicutes_515620          | 515620  | <i>Eubacterium eligens</i>                                          | Firmicutes          | Bacteria |
| Fusobacteria_190304        | 190304  | <i>Fusobacterium nucleatum subsp. nucleatum</i>                     | Fusobacteria        | Bacteria |
| Fusobacteria_519441        | 519441  | <i>Streptobacillus moniliformis</i>                                 | Fusobacteria        | Bacteria |
| Fusobacteria_523794        | 523794  | <i>Leptotrichia buccalis</i>                                        | Fusobacteria        | Bacteria |
| Planctomycetes_243090      | 243090  | <i>Rhodopirellula baltica</i>                                       | Planctomycetes      | Bacteria |
| Planctomycetes_521674      | 521674  | <i>Planctopirus limnophila</i>                                      | Planctomycetes      | Bacteria |
| Planctomycetes_530564      | 530564  | <i>Pirellula staleyi</i>                                            | Planctomycetes      | Bacteria |
| Proteobacteria_265072      | 265072  | <i>Methylobacillus flagellatus</i>                                  | Proteobacteria      | Bacteria |
| Proteobacteria_365044      | 365044  | <i>Polaromonas naphthalenivorans</i>                                | Proteobacteria      | Bacteria |
| Proteobacteria_557598      | 557598  | <i>Laribacter hongkongensis</i>                                     | Proteobacteria      | Bacteria |
| Spirochaetes_243275        | 243275  | <i>Treponema denticola</i>                                          | Spirochaetes        | Bacteria |
| Spirochaetes_573413        | 573413  | <i>Sediminispirochaeta smaragdinae</i>                              | Spirochaetes        | Bacteria |
| Thermotogae_381764         | 381764  | <i>Fervidobacterium nodosum</i>                                     | Thermotogae         | Bacteria |
| Thermotogae_390874         | 390874  | <i>Thermotoga petrophila</i>                                        | Thermotogae         | Bacteria |
| Thermotogae_391009         | 391009  | <i>Thermosiphon melanesiensis</i>                                   | Thermotogae         | Bacteria |
| Unclassified_671143        | 671143  | <i>Candidatus Methyloirabilis oxyfera</i>                           | Unclassified        | Bacteria |
| Unclassified_1635277       | 1635277 | candidate division TA06 bacterium 34_109                            | Unclassified        | Bacteria |
| Unclassified_1640508       | 1640508 | <i>Candidatus Dadabacteria bacterium CSP1-2</i>                     | Unclassified        | Bacteria |
| Unclassified_1640516       | 1640516 | candidate division NC10 bacterium CSP1-5                            | Unclassified        | Bacteria |
| Unclassified_1703775       | 1703775 | candidate division WOR_1 bacterium DG_54_3                          | Unclassified        | Bacteria |
| Unclassified_1703779       | 1703779 | candidate division WOR_3 bacterium SM23_42                          | Unclassified        | Bacteria |
| Unclassified_1703780       | 1703780 | candidate division WOR_3 bacterium SM23_60                          | Unclassified        | Bacteria |
| Unclassified_1797270       | 1797270 | <i>Candidatus Aminicenantes bacterium RBG_13_63_10</i>              | Unclassified        | Bacteria |
| Unclassified_1797273       | 1797273 | <i>Candidatus Aminicenantes bacterium RBG_16_63_16</i>              | Unclassified        | Bacteria |
| Unclassified_1797275       | 1797275 | <i>Candidatus Aminicenantes bacterium RBG_19FT_COMBO_58_17</i>      | Unclassified        | Bacteria |
| Unclassified_1797291       | 1797291 | <i>Candidatus Atribacteria bacterium RBG_19FT_COMBO_35_14</i>       | Unclassified        | Bacteria |
| Unclassified_1798559       | 1798559 | candidate division KSB1 bacterium RBG_16_48_16                      | Unclassified        | Bacteria |
| Unclassified_1801658       | 1801658 | candidate division NC10 bacterium RIFCSPLOWO2_02_FULL_66_22         | Unclassified        | Bacteria |
| Unclassified_1802102       | 1802102 | <i>Candidatus Rokubacteria bacterium RIFCSPHIGHO2_02_FULL_73_26</i> | Unclassified        | Bacteria |
| Unclassified_1805370       | 1805370 | <i>Candidatus Rokubacteria bacterium 13_2_20CM_2_70_11</i>          | Unclassified        | Bacteria |
| Unclassified_1817851       | 1817851 | <i>Candidatus Edwardsbacteria bacterium GWF2_54_11</i>              | Unclassified        | Bacteria |
| Unclassified_1817856       | 1817856 | <i>Candidatus Eisenbacteria bacterium RBG_16_71_46</i>              | Unclassified        | Bacteria |
| Unclassified_1817859       | 1817859 | <i>Candidatus Firestonebacteria bacterium RIFOXYA2_FULL_40_8</i>    | Unclassified        | Bacteria |
| Unclassified_1817861       | 1817861 | <i>Candidatus Firestonebacteria bacterium RIFOXYC2_FULL_39_67</i>   | Unclassified        | Bacteria |
| Unclassified_1817863       | 1817863 | <i>Candidatus Fischerbacteria bacterium RBG_13_37_8</i>             | Unclassified        | Bacteria |
| Unclassified_1817867       | 1817867 | <i>Candidatus Glassbacteria bacterium RIFCSPLOWO2_12_FULL_58_11</i> | Unclassified        | Bacteria |
| Unclassified_1817872       | 1817872 | <i>Candidatus Margulisbacteria bacterium GWE2_39_32</i>             | Unclassified        | Bacteria |
| Unclassified_1817873       | 1817873 | <i>Candidatus Margulisbacteria bacterium GWF2_35_9</i>              | Unclassified        | Bacteria |
| Unclassified_1817890       | 1817890 | <i>Candidatus Raymondobacteria bacterium RIFOXDYD12_FULL_49_13</i>  | Unclassified        | Bacteria |
| Unclassified_1968529       | 1968529 | <i>Candidatus Aminicenantes bacterium 4484_214</i>                  | Unclassified        | Bacteria |
| Unclassified_1970772       | 1970772 | candidate division KSB1 bacterium 4484_87                           | Unclassified        | Bacteria |
| Verrucomicrobia_349741     | 349741  | <i>Akkermansia muciniphila</i>                                      | Verrucomicrobia     | Bacteria |
| Verrucomicrobia_481448     | 481448  | <i>Methylacidiphilum inferorum</i>                                  | Verrucomicrobia     | Bacteria |
| Verrucomicrobia_583355     | 583355  | <i>Coraliomargarita akajimensis</i>                                 | Verrucomicrobia     | Bacteria |
|                            |         |                                                                     |                     |          |
| Alveolata_5823             | 5823    | <i>Plasmodium berghei</i>                                           | Alveolata           | Eukarya  |
| Alveolata_5825             | 5825    | <i>Plasmodium chabaudi</i>                                          | Alveolata           | Eukarya  |
| Alveolata_5851             | 5851    | <i>Plasmodium knowlesi</i>                                          | Alveolata           | Eukarya  |
| Alveolata_36329            | 36329   | <i>Plasmodium falciparum</i>                                        | Alveolata           | Eukarya  |

|                         |         |                                          |                    |         |
|-------------------------|---------|------------------------------------------|--------------------|---------|
| Alveolata_126793        | 126793  | <i>Plasmodium vivax</i>                  | Alveolata          | Eukarya |
| Alveolata_137071        | 137071  | <i>Plasmodium falciparum</i>             | Alveolata          | Eukarya |
| Alveolata_432359        | 432359  | <i>Toxoplasma gondii</i>                 | Alveolata          | Eukarya |
| Alveolata_1202447       | 1202447 | <i>Symbiodinium minutum</i>              | Alveolata          | Eukarya |
| Choanoflagellida_81824  | 81824   | <i>Monosiga brevicollis</i>              | Choanoflagellida   | Eukarya |
| Choanoflagellida_946362 | 946362  | <i>Salpingoeca rosetta</i>               | Choanoflagellida   | Eukarya |
| Cryptophyta_905079      | 905079  | <i>Guillardia theta CCMP2712</i>         | Cryptophyta        | Eukarya |
| Euglenozoa_5665         | 5665    | <i>Leishmania mexicana</i>               | Euglenozoa         | Eukarya |
| Euglenozoa_5692         | 5692    | <i>Trypanosoma congolense</i>            | Euglenozoa         | Eukarya |
| Euglenozoa_5699         | 5699    | <i>Trypanosoma vivax</i>                 | Euglenozoa         | Eukarya |
| Euglenozoa_5702         | 5702    | <i>Trypanosoma brucei brucei</i>         | Euglenozoa         | Eukarya |
| Euglenozoa_31285        | 31285   | <i>Trypanosoma brucei gambiense</i>      | Euglenozoa         | Eukarya |
| Euglenozoa_185431       | 185431  | <i>Trypanosoma brucei brucei</i>         | Euglenozoa         | Eukarya |
| Euglenozoa_347515       | 347515  | <i>Leishmania major strain Friedlin</i>  | Euglenozoa         | Eukarya |
| Euglenozoa_353153       | 353153  | <i>Trypanosoma cruzi</i>                 | Euglenozoa         | Eukarya |
| Euglenozoa_420245       | 420245  | <i>Leishmania braziliensis</i>           | Euglenozoa         | Eukarya |
| Euglenozoa_435258       | 435258  | <i>Leishmania infantum</i>               | Euglenozoa         | Eukarya |
| Fungi_5270              | 5270    | <i>Ustilago maydis</i>                   | Fungi              | Eukarya |
| Fungi_36080             | 36080   | <i>Mucor circinelloides</i>              | Fungi              | Eukarya |
| Fungi_39416             | 39416   | <i>Tuber melanosporum</i>                | Fungi              | Eukarya |
| Fungi_192523            | 192523  | <i>Agaricus bisporus var. bisporus</i>   | Fungi              | Eukarya |
| Fungi_240176            | 240176  | <i>Coprinopsis cinerea</i>               | Fungi              | Eukarya |
| Fungi_246409            | 246409  | <i>Rhizopus delemar</i>                  | Fungi              | Eukarya |
| Fungi_284590            | 284590  | <i>Kluyveromyces lactis</i>              | Fungi              | Eukarya |
| Fungi_284591            | 284591  | <i>Yarrowia lipolytica</i>               | Fungi              | Eukarya |
| Fungi_284811            | 284811  | <i>Ashbya gossypii</i>                   | Fungi              | Eukarya |
| Fungi_285006            | 285006  | <i>Saccharomyces cerevisiae</i>          | Fungi              | Eukarya |
| Fungi_486041            | 486041  | <i>Laccaria bicolor</i>                  | Fungi              | Eukarya |
| Fungi_510953            | 510953  | <i>Neurospora discreta</i>               | Fungi              | Eukarya |
| Fungi_602072            | 602072  | <i>Aspergillus carbonarius</i>           | Fungi              | Eukarya |
| Fungi_644223            | 644223  | <i>Komagataella phaffii</i>              | Fungi              | Eukarya |
| Glaucocystophyceae_2762 | 2762    | <i>Cyanophora paradoxa</i>               | Glaucocystophyceae | Eukarya |
| Haptophyceae_2903       | 2903    | <i>Emiliana huxleyi</i>                  | Haptophyceae       | Eukarya |
| Ichthyosporaea_192875   | 192875  | <i>Capsaspora owczarzaki</i>             | Ichthyosporaea     | Eukarya |
| Ichthyosporaea_667725   | 667725  | <i>Sphaeroforma arctica JP610</i>        | Ichthyosporaea     | Eukarya |
| Metazoa_6085            | 6085    | <i>Hydra vulgaris</i>                    | Metazoa            | Eukarya |
| Metazoa_7227            | 7227    | <i>Drosophila melanogaster</i>           | Metazoa            | Eukarya |
| Metazoa_8355            | 8355    | <i>Xenopus laevis</i>                    | Metazoa            | Eukarya |
| Metazoa_9544            | 9544    | <i>Macaca mulatta</i>                    | Metazoa            | Eukarya |
| Metazoa_9600            | 9600    | <i>Pongo pygmaeus</i>                    | Metazoa            | Eukarya |
| Metazoa_37347           | 37347   | <i>Tupaia belangeri</i>                  | Metazoa            | Eukarya |
| Metazoa_132908          | 132908  | <i>Pteropus vampyrus</i>                 | Metazoa            | Eukarya |
| Rhizaria_753081         | 753081  | <i>Bigeloviella natans</i>               | Rhizaria           | Eukarya |
| Rhodophyta_35688        | 35688   | <i>Porphyridium purpureum</i>            | Rhodophyta         | Eukarya |
| Rhodophyta_45157        | 45157   | <i>Cyanidioschyzon merolae</i>           | Rhodophyta         | Eukarya |
| Rhodophyta_130081       | 130081  | <i>Galdieria sulphuraria</i>             | Rhodophyta         | Eukarya |
| Rhodophyta_280699       | 280699  | <i>Cyanidioschyzon merolae</i>           | Rhodophyta         | Eukarya |
| stramenopiles_186039    | 186039  | <i>Fragilariopsis cylindrus</i>          | stramenopiles      | Eukarya |
| stramenopiles_296543    | 296543  | <i>Thalassiosira pseudonana CCMP1335</i> | stramenopiles      | Eukarya |
| stramenopiles_403677    | 403677  | <i>Phytophthora infestans</i>            | stramenopiles      | Eukarya |
| stramenopiles_556484    | 556484  | <i>Phaeodactylum tricorutum</i>          | stramenopiles      | Eukarya |
| Viridiplantae_3055      | 3055    | <i>Chlamydomonas reinhardtii</i>         | Viridiplantae      | Eukarya |
| Viridiplantae_3067      | 3067    | <i>Volvox carteri</i>                    | Viridiplantae      | Eukarya |
| Viridiplantae_3068      | 3068    | <i>Volvox carteri f. nagariensis</i>     | Viridiplantae      | Eukarya |
| Viridiplantae_3077      | 3077    | <i>Chlorella vulgaris</i>                | Viridiplantae      | Eukarya |
| Viridiplantae_3659      | 3659    | <i>Cucumis sativus</i>                   | Viridiplantae      | Eukarya |
| Viridiplantae_3702      | 3702    | <i>Arabidopsis thaliana</i>              | Viridiplantae      | Eukarya |
| Viridiplantae_4558      | 4558    | <i>Sorghum bicolor</i>                   | Viridiplantae      | Eukarya |
| Viridiplantae_39946     | 39946   | <i>Oryza sativa subsp. indica</i>        | Viridiplantae      | Eukarya |
| Viridiplantae_41874     | 41874   | <i>Bathycoccus prasinos</i>              | Viridiplantae      | Eukarya |
| Viridiplantae_70448     | 70448   | <i>Ostreococcus tauri</i>                | Viridiplantae      | Eukarya |
| Viridiplantae_296587    | 296587  | <i>Micromonas commoda</i>                | Viridiplantae      | Eukarya |
| Viridiplantae_381124    | 381124  | <i>Zea mays subsp. mays</i>              | Viridiplantae      | Eukarya |
| Viridiplantae_385169    | 385169  | <i>Ostreococcus sp</i>                   | Viridiplantae      | Eukarya |
| Viridiplantae_436017    | 436017  | <i>Ostreococcus lucimarinus</i>          | Viridiplantae      | Eukarya |
| Viridiplantae_554065    | 554065  | <i>Chlorella variabilis</i>              | Viridiplantae      | Eukarya |
| Viridiplantae_564608    | 564608  | <i>Micromonas pusilla</i>                | Viridiplantae      | Eukarya |
| Viridiplantae_574566    | 574566  | <i>Coccomyxa subellipsoidea</i>          | Viridiplantae      | Eukarya |
| Viridiplantae_763042    | 763042  | <i>Asterochloris sp</i>                  | Viridiplantae      | Eukarya |

**Table S2.** List of sequence evolution models evaluated for the core-genes-I dataset

| Base Model | Heterogeneity | K   | Likelihood | LLR   | AIC     | BIC     |
|------------|---------------|-----|------------|-------|---------|---------|
| LG         | +G+I          | 87  | -492883    | 0     | 985940  | 986553  |
| LG         | +G+I+F        | 106 | -493145    | 262   | 986502  | 987250  |
| LG         | +G            | 86  | -493206    | 324   | 986585  | 987191  |
| LG         | +G+F          | 105 | -493420    | 538   | 987051  | 987791  |
| RtREV      | +G+I+F        | 106 | -494212    | 1330  | 988637  | 989385  |
| WAG        | +G+I+F        | 106 | -496011    | 3128  | 992234  | 992982  |
| WAG        | +G+I          | 87  | -496884    | 4001  | 993942  | 994555  |
| VT         | +G+I+F        | 106 | -496978    | 4096  | 994169  | 994916  |
| Blosum62   | +G+I          | 87  | -497004    | 4121  | 994182  | 994796  |
| VT         | +G+I          | 87  | -497243    | 4360  | 994660  | 995274  |
| RtREV      | +G+I          | 87  | -497421    | 4538  | 995016  | 995630  |
| Blosum62   | +G+I+F        | 106 | -497536    | 4654  | 995285  | 996033  |
| CpREV      | +G+I          | 87  | -498666    | 5783  | 997506  | 998120  |
| CpREV      | +G+I+F        | 106 | -498692    | 5809  | 997596  | 998344  |
| JTT        | +G+I          | 87  | -501937    | 9055  | 1004049 | 1004662 |
| JTT        | +G+I+F        | 106 | -501986    | 9103  | 1004183 | 1004931 |
| MtZoa      | +G+I+F        | 106 | -502729    | 9846  | 1005670 | 1006418 |
| DCMut      | +G+I+F        | 106 | -503422    | 10539 | 1007055 | 1007803 |
| Dayhoff    | +G+I+F        | 106 | -503425    | 10543 | 1007063 | 1007811 |
| MtREV      | +G+I+F        | 106 | -505701    | 12818 | 1011614 | 1012362 |
| MtArt      | +G+I+F        | 106 | -507424    | 14541 | 1015060 | 1015807 |
| Flu        | +G+I+F        | 106 | -510433    | 17550 | 1021078 | 1021826 |
| HIVb       | +G+I+F        | 106 | -514167    | 21284 | 1028546 | 1029294 |
| HIVb       | +G+I          | 87  | -514445    | 21563 | 1029065 | 1029679 |
| AB         | +G+I+F        | 106 | -515188    | 22305 | 1030588 | 1031336 |
| MtMam      | +G+I+F        | 106 | -520429    | 27546 | 1041069 | 1041817 |
| HIVw       | +G+I+F        | 106 | -532211    | 39328 | 1064634 | 1065381 |

Base Model = Generalized empirical amino acid exchange rate (probability)

Heterogeneity = Parameter for approximating site-specific variation

+GX; where G is discrete Gamma model, X is no. of categories (default X=4)

+I; proportion of invariant sites

+F; empirical amino acid frequencies estimated from the alignment

K = Number of parameters

Likelihood = Raw likelihood score

LLR = Log likelihood ratio given as the difference from the best fitting model

AIC = Akaike information criterion

BIC = Bayesian information criterion

**Table S3.** List of sequence evolution models evaluated for the core-genes-II dataset

| Base Model | Heterogeneity | K   | Likelihood | LLR   | AIC     | BIC     |
|------------|---------------|-----|------------|-------|---------|---------|
| LG         | +G+I          | 191 | -1136837   | 0     | 2274056 | 2275431 |
| LG         | +G+I+F        | 210 | -1137034   | 197   | 2274488 | 2276000 |
| LG         | +G            | 190 | -1137480   | 643   | 2275339 | 2276707 |
| LG         | +G+F          | 209 | -1137609   | 773   | 2275637 | 2277141 |
| RtREV      | +G+I+F        | 210 | -1139815   | 2978  | 2280050 | 2281562 |
| WAG        | +G+I+F        | 210 | -1143506   | 6669  | 2287432 | 2288944 |
| VT         | +G+I+F        | 210 | -1145801   | 8964  | 2292021 | 2293533 |
| WAG        | +G+I          | 191 | -1146408   | 9571  | 2293198 | 2294572 |
| Blosum62   | +G+I          | 191 | -1146621   | 9784  | 2293624 | 2294999 |
| VT         | +G+I          | 191 | -1146865   | 10028 | 2294112 | 2295487 |
| Blosum62   | +G+I+F        | 210 | -1147798   | 10961 | 2296015 | 2297527 |
| CpREV      | +G+I          | 191 | -1149437   | 12600 | 2299256 | 2300630 |
| CpREV      | +G+I+F        | 210 | -1151328   | 14491 | 2303077 | 2304588 |
| JTT        | +G+I+F        | 210 | -1156779   | 19942 | 2313978 | 2315490 |
| JTT        | +G+I          | 191 | -1157879   | 21043 | 2316141 | 2317516 |
| DCMut      | +G+I+F        | 210 | -1158756   | 21919 | 2317931 | 2319443 |
| Dayhoff    | +G+I+F        | 210 | -1158763   | 21926 | 2317947 | 2319458 |
| MtZoa      | +G+I+F        | 210 | -1159644   | 22807 | 2319708 | 2321220 |
| MtREV      | +G+I+F        | 210 | -1167250   | 30413 | 2334921 | 2336432 |
| MtArt      | +G+I+F        | 210 | -1170882   | 34046 | 2342185 | 2343696 |
| Flu        | +G+I+F        | 210 | -1177036   | 40199 | 2354492 | 2356004 |
| HIVb       | +G+I+F        | 210 | -1186361   | 49524 | 2373143 | 2374654 |
| AB         | +G+I+F        | 210 | -1188156   | 51319 | 2376731 | 2378242 |
| MtMam      | +G+I+F        | 210 | -1202305   | 65468 | 2405029 | 2406541 |
| HIVw       | +G+I+F        | 210 | -1229597   | 92760 | 2459614 | 2461126 |

Base Model = Generalized empirical amino acid exchange rate (probability)

Heterogeneity = Parameter for approximating site-specific variation

+GX; where G is discrete Gamma model, X is no. of categories (default X=4)

+I; proportion of invariant sites

+F; empirical amino acid frequencies estimated from the alignment

K = Number of parameters

Likelihood = Raw likelihood score

LLR = Log likelihood ratio given as the difference from the best fitting model

AIC = Akaike information criterion

BIC = Bayesian information criterion
